# Supplementary material for: Discovery of TaFeSb-based half-Heuslers with high thermoelectric performance
Source: PubMed Central journal article supplement (PMC6336844; doi:10.1038/s41467-018-08223-5), 2019-01-17
Supplement: 41467_2018_8223_MOESM1_ESM.pdf [file 41467_2018_8223_MOESM1_ESM.pdf]

## Supplementary Information

### Discovery of TaFeSb-based half-Heuslers with high thermoelectric performance

Hangtian Zhu<sup>†1</sup>, Jun Mao<sup>†1</sup>, Yuwei Li<sup>2</sup>, Jifeng Sun<sup>2</sup>, Yumei Wang<sup>3</sup>, Qing Zhu<sup>1</sup>, Guannan Li<sup>4</sup>, Qichen Song<sup>5</sup>, Jiawei Zhou<sup>5</sup>, Yuhao Fu<sup>2</sup>, Ran He<sup>6</sup>, Tian Tong<sup>7</sup>, Zihang Liu<sup>1</sup>, Wuyang Ren<sup>1,8</sup>, Li You<sup>1,9</sup>, Zhiming Wang<sup>8</sup>, Jun Luo<sup>9</sup>, Andrei Sotnikov<sup>6</sup>, Jiming Bao<sup>7</sup>, Kornelius Nielsch<sup>6</sup>, Gang Chen<sup>5</sup>, David J. Singh<sup>2\*</sup>, and Zhifeng Ren<sup>1\*</sup>

<sup>1</sup> *Department of Physics and Texas Center for Superconductivity, University of Houston, Houston, TX 77204, U.S.A.*

<sup>2</sup> *Department of Physics and Astronomy, University of Missouri, Columbia, MO 65211, U.S.A.*

<sup>3</sup> *Beijing National Laboratory for Condensed Matter Physics, Institute of Physics, Chinese Academy of Sciences, P.O. Box 603, Beijing 100190, China*

<sup>4</sup> *Department of Materials and Energy, Southwest University, Chongqing 400715, China*

<sup>5</sup> *Department of Mechanical Engineering, Massachusetts Institute of Technology, Cambridge, MA 02139, U.S.A.*

<sup>6</sup> *Institute for Metallic Materials, IFW-Dresden, Dresden 01069, Germany*

<sup>7</sup> *Department of Electrical and Computer Engineering, University of Houston, Houston, TX 77204, United States*

<sup>8</sup> *Institute of Fundamental and Frontier Sciences, University of Electronic Science and Technology of China, Chengdu 610054, China*

<sup>9</sup> *School of Materials Science and Engineering, Shanghai University, Shanghai 200444, China*

<sup>†</sup> These authors contribute equally to this work.

\* Author to whom correspondence should be addressed: singhdj@missouri.edu; zren@uh.edu.

## Supplementary Figures

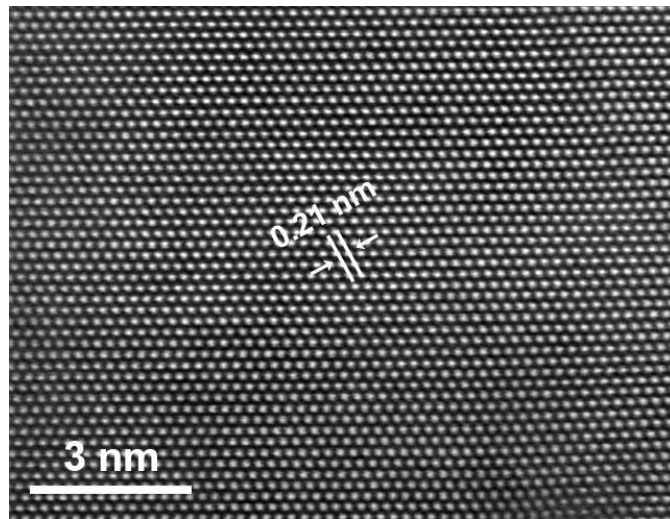

**Supplementary Figure 1.** STEM image of the prepared TaFeSb half-Heusler. The ( $2\bar{2}0$ ) plane with a spacing of  $\sim 0.21$  nm has been verified.

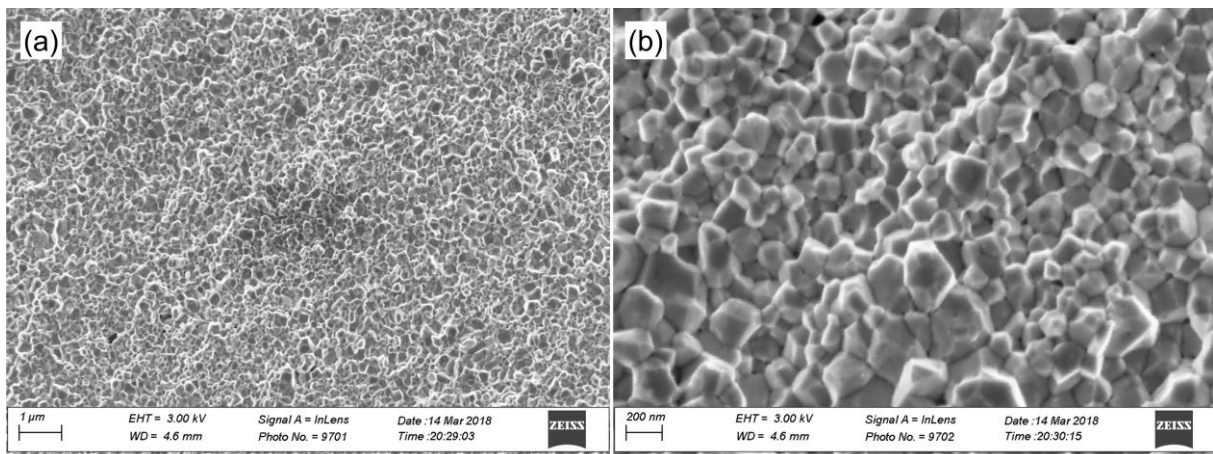

**Supplementary Figure 2.** Microstructures of the pristine TaFeSb half-Heusler. (a) and (b) Scanning electron microscopy images.

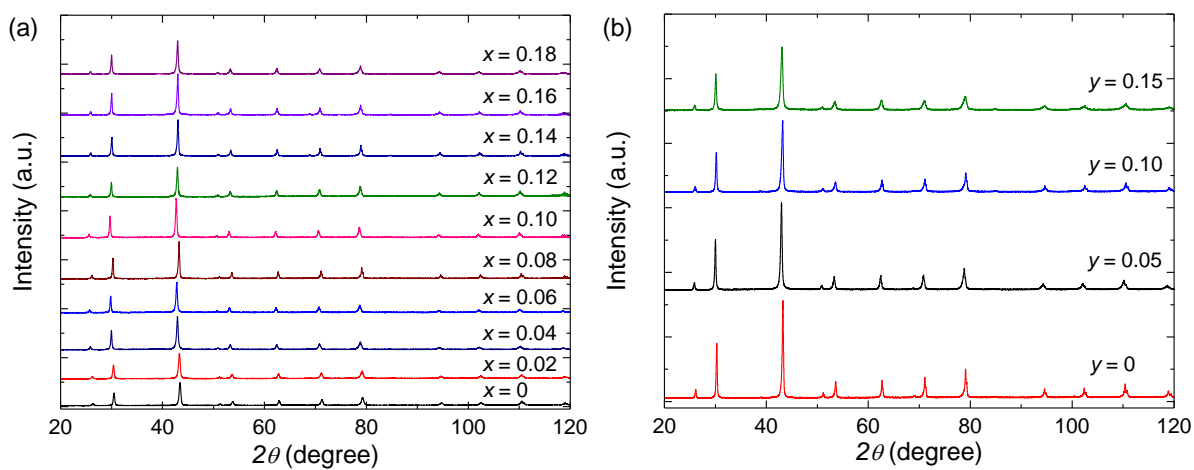

**Supplementary Figure 3. Phase composition of TaFeSb-based half-Heuslers.** XRD patterns of the prepared (a) Ta<sub>1-x</sub>Ti<sub>x</sub>FeSb ( $x = 0, 0.02, 0.04, 0.06, 0.08, 0.10, 0.12, 0.14, 0.16,$  and  $0.18$ ) and (b) Ta<sub>0.84-y</sub>V<sub>y</sub>Ti<sub>0.16</sub>FeSb ( $y = 0, 0.05, 0.10,$  and  $0.15$ ).

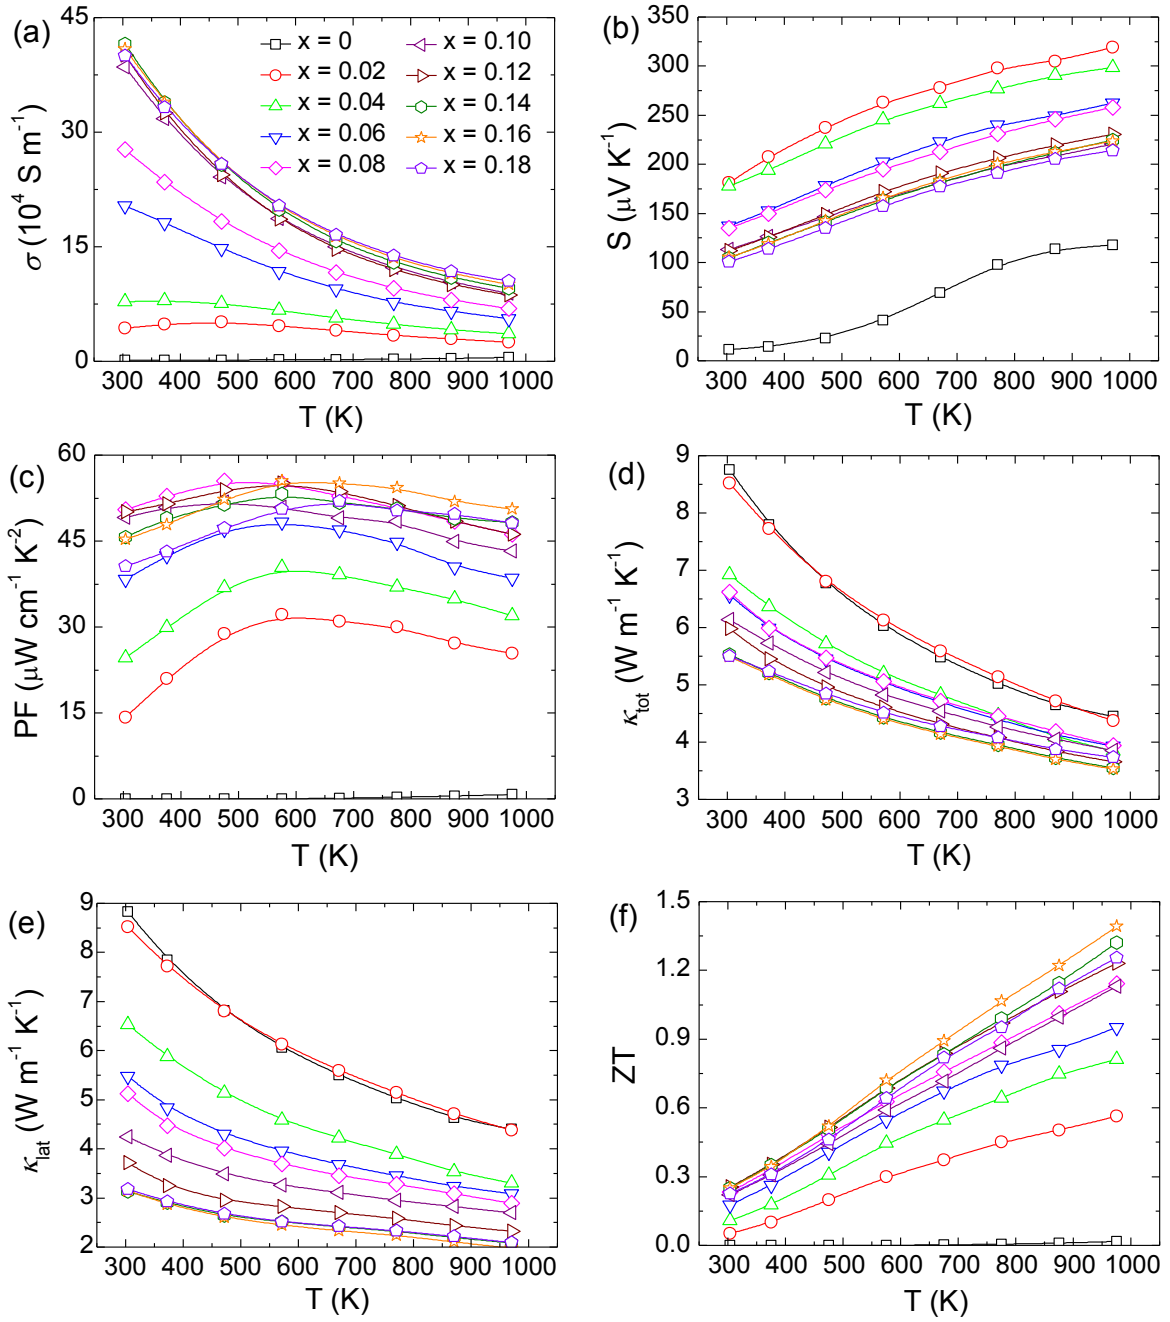

**Supplementary Figure 4. Thermoelectric properties of  $\text{Ta}_{1-x}\text{Ti}_x\text{FeSb}$  ( $x = 0, 0.02, 0.04, 0.06, 0.08, 0.10, 0.12, 0.14, 0.16, \text{ and } 0.18$ ). (a) Electrical conductivity, (b) Seebeck coefficient, (c) power factor, (d) total thermal conductivity, (e) lattice thermal conductivity, and (f)  $ZT$ .**

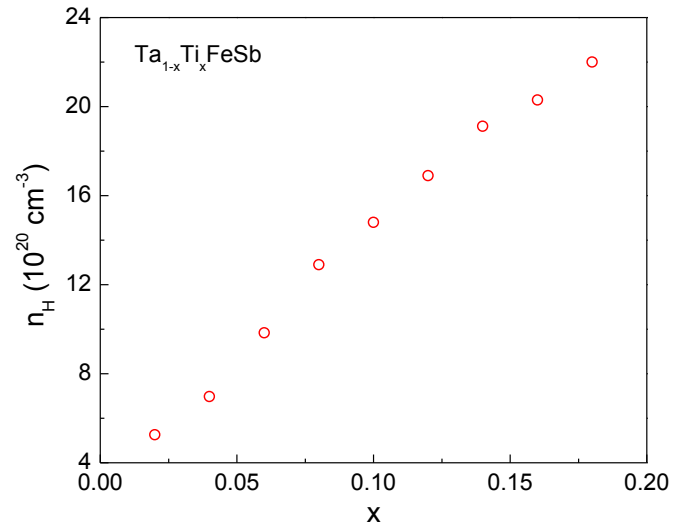

**Supplementary Figure 5. Composition-dependent room-temperature hole concentration.**

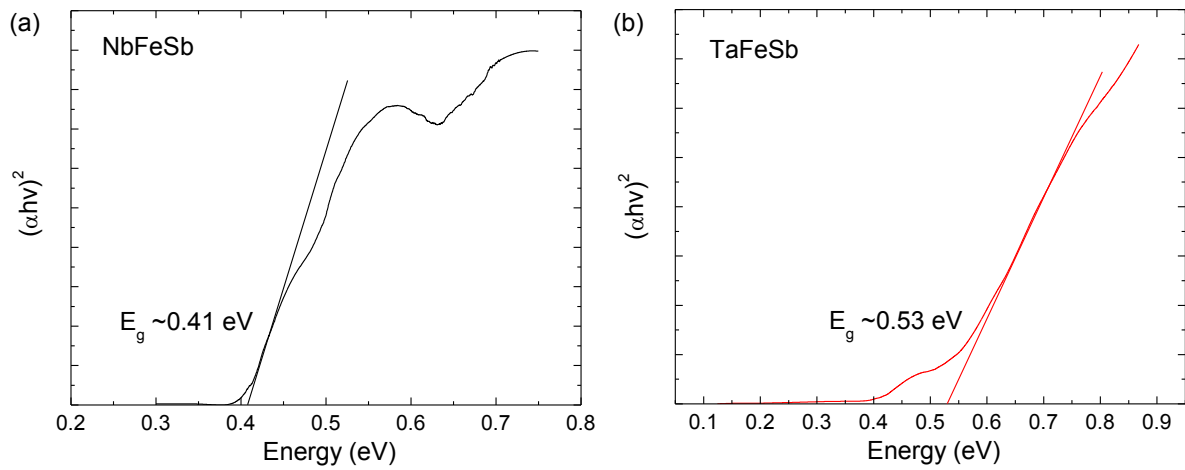

**Supplementary Figure 6. Measured bandgap of the pristine (a) NbFeSb and (b) TaFeSb.**

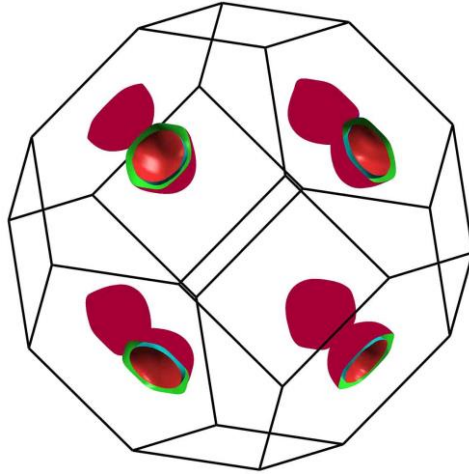

**Supplementary Figure 7. The iso-energy carrier pockets of TaFeSb at 0.1 eV below the valence band maximum.**

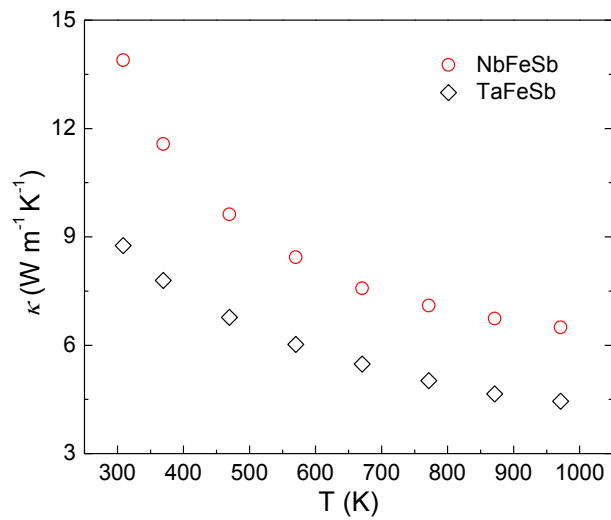

**Supplementary Figure 8. The thermal conductivity of the undoped NbFeSb and TaFeSb.** The samples are both prepared by the identical ball-milling and hot-pressing method.

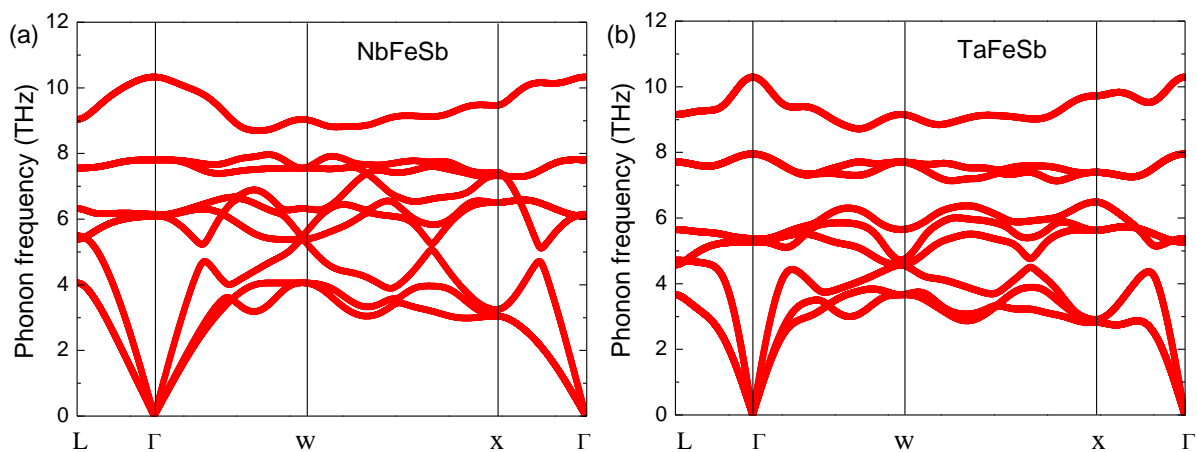

**Supplementary Figure 9. Comparison of the phonon dispersion between (a) NbFeSb and (b) TaFeSb.**

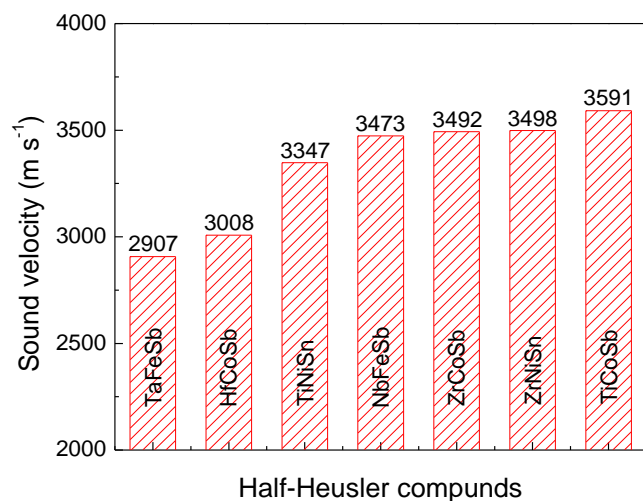

**Supplementary Figure 10. Comparison of sound velocity between several half-Heusler compounds.**

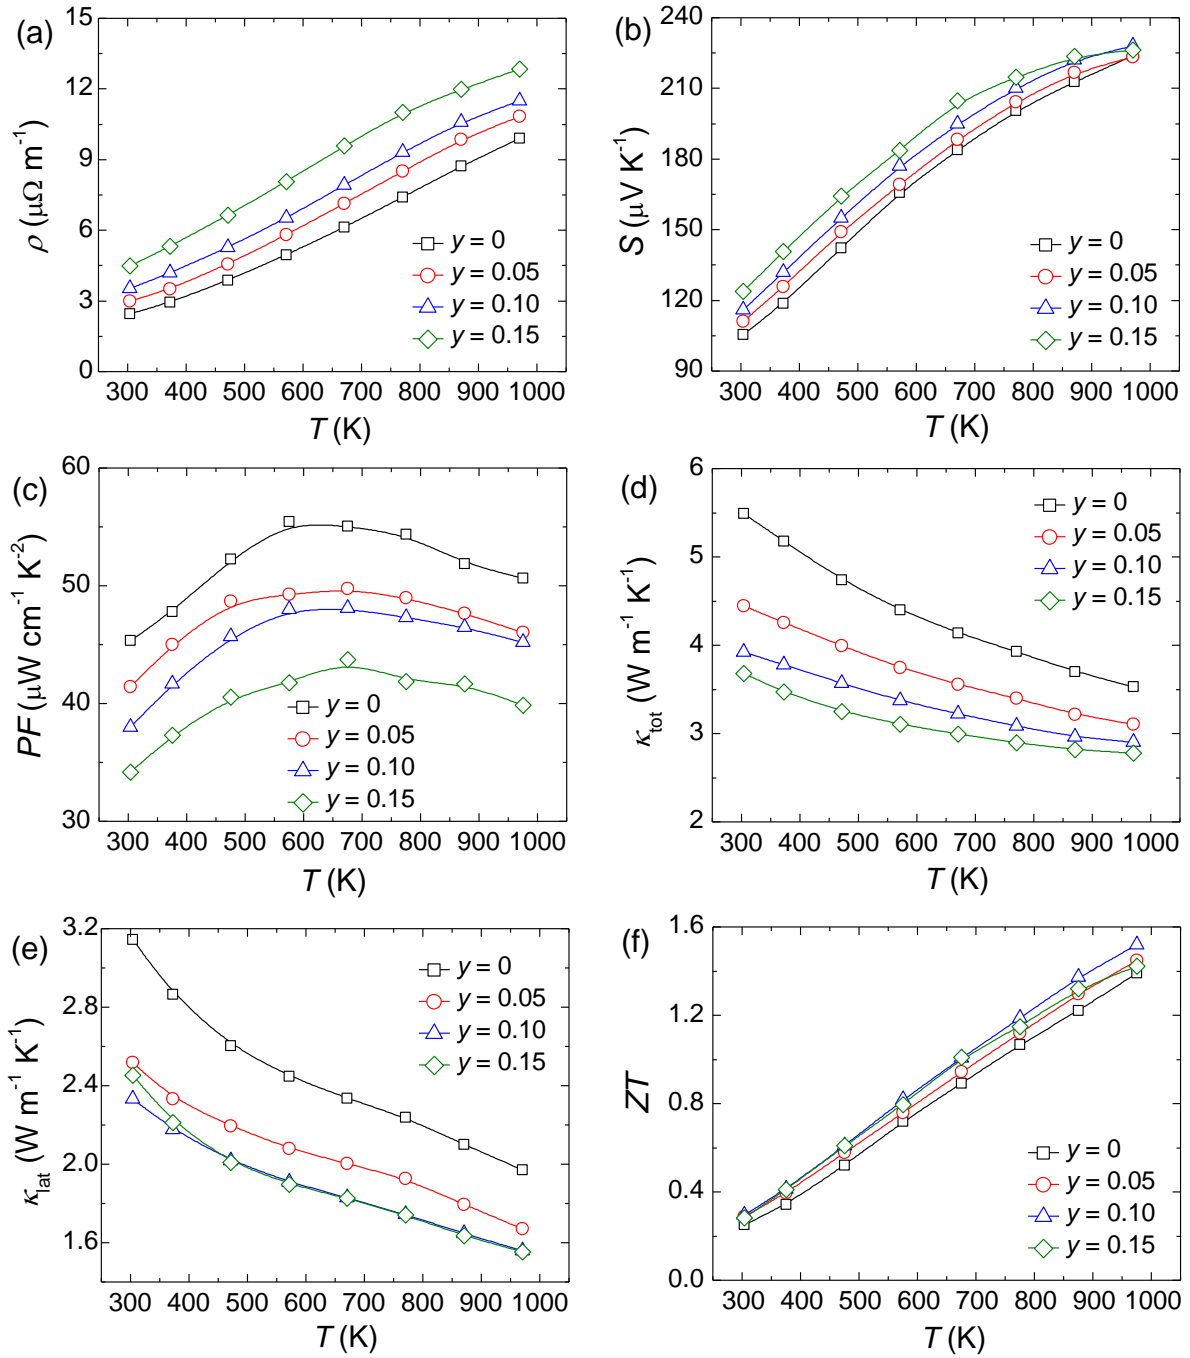

**Supplementary Figure 11. Thermoelectric properties of  $\text{Ta}_{0.84-y}\text{V}_y\text{Ti}_{0.16}\text{FeSb}$  ( $y = 0, 0.05, 0.10, \text{ and } 0.15$ ).** (a) Electrical resistivity, (b) Seebeck coefficient, (c) power factor, (d) total thermal conductivity, (e) lattice thermal conductivity, and (f)  $ZT$ .



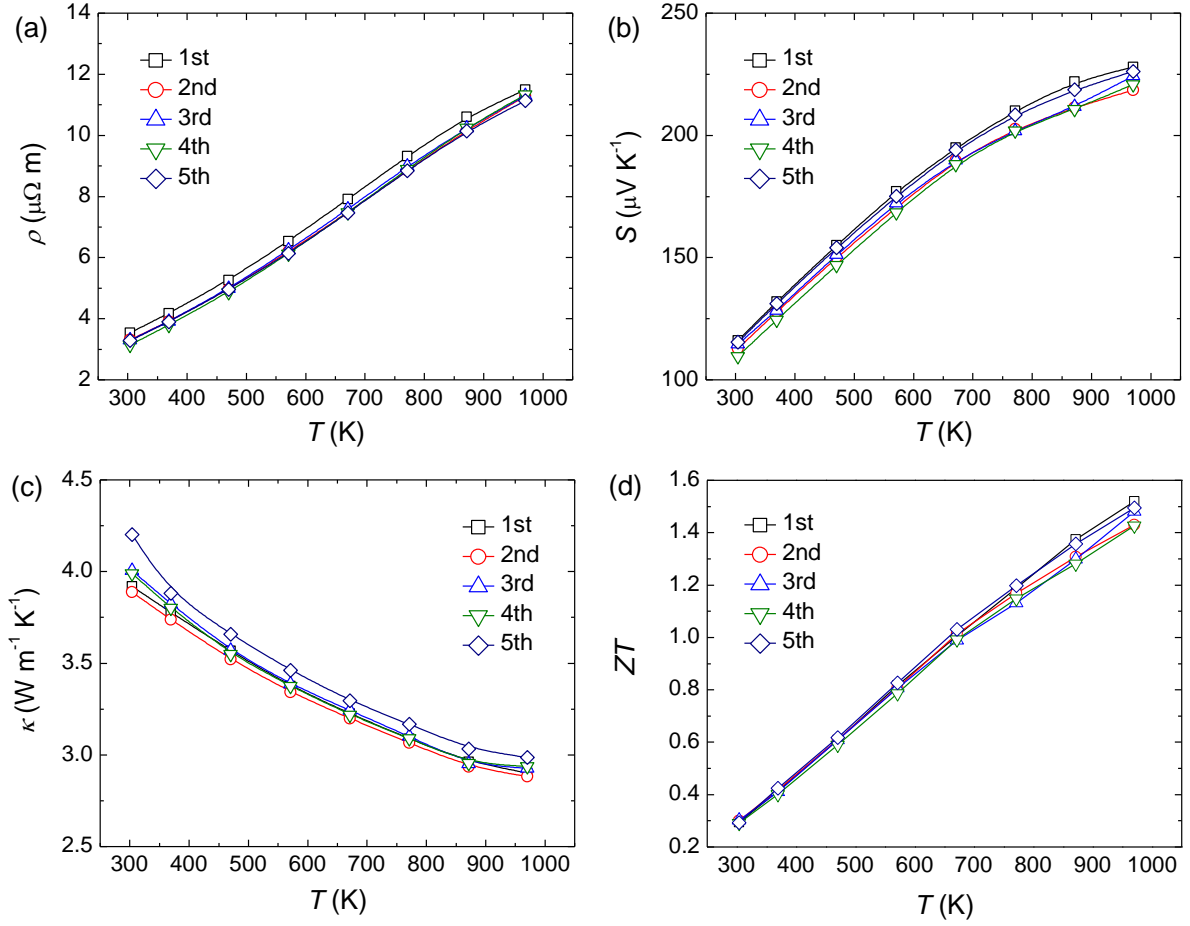

**Supplementary Figure 12. Reproducibility of the thermoelectric properties of  $\text{Ta}_{0.74}\text{V}_{0.1}\text{Ti}_{0.16}\text{FeSb}$ .** Five different batches of  $\text{Ta}_{0.74}\text{V}_{0.1}\text{Ti}_{0.16}\text{FeSb}$  were prepared and the thermoelectric properties of the specimens were then characterized. (a) Electrical resistivity, (b) Seebeck coefficient, (c) thermal conductivity, and (d)  $ZT$ .

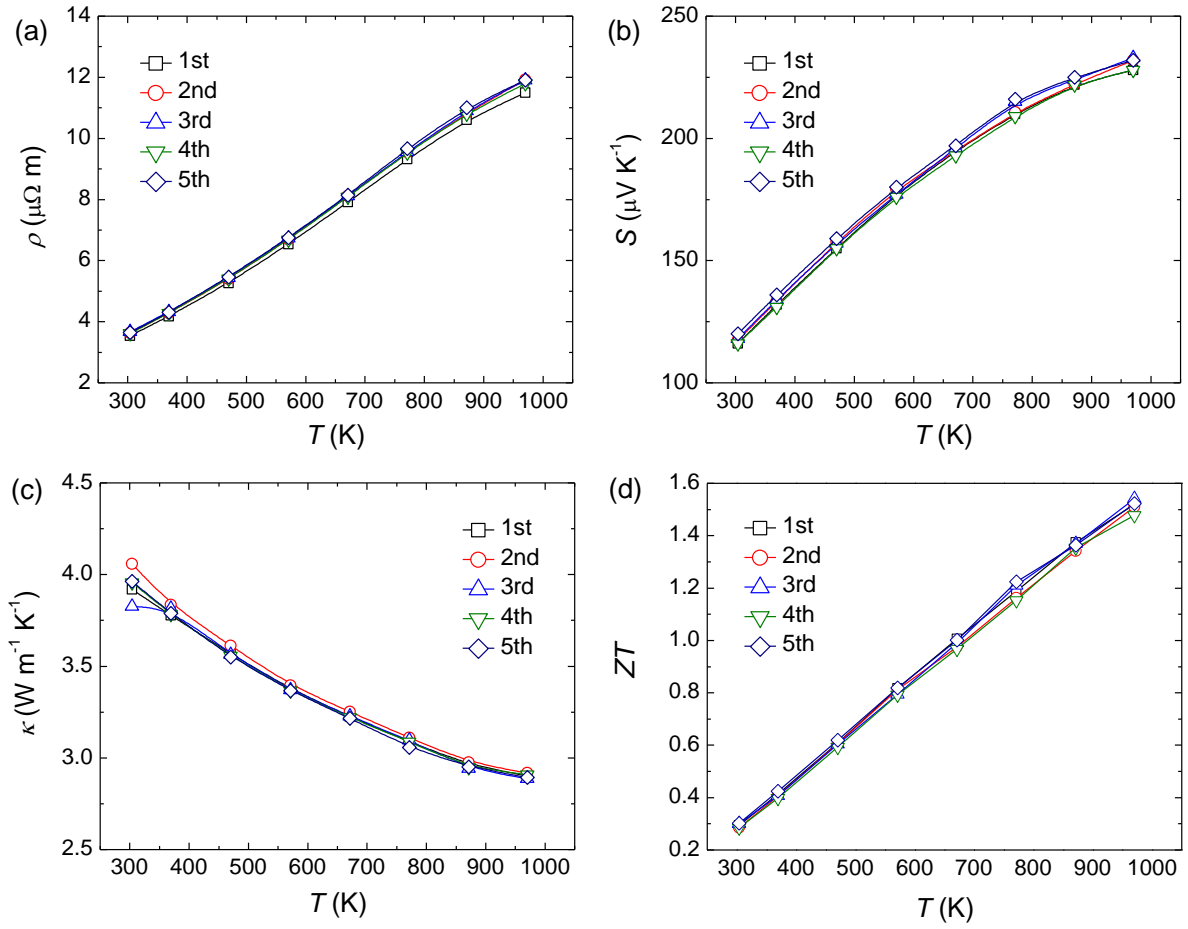

**Supplementary Figure 13. Thermal stability of  $\text{Ta}_{0.74}\text{V}_{0.1}\text{Ti}_{0.16}\text{FeSb}$ .** Thermoelectric properties of the same  $\text{Ta}_{0.74}\text{V}_{0.1}\text{Ti}_{0.16}\text{FeSb}$  specimen measured five times. (a) Electrical resistivity, (b) Seebeck coefficient, (c) thermal conductivity, and (d)  $ZT$ .
